# Supplementary material
Source: Elsevier journal article supplement (https://www.sciencedirect.com/science/article/pii/S0300289619303849)
Supplement: mmc1 [file S0300289619303849:mmc1.docx]

**Table S1** **Baseline clinical features of the study population**

| Characteristics | survival group (n) | non-survival group (n) | *p* value |
| --- | --- | --- | --- |
| Patients | 57（45.2） | 69（54.8） |  |
| Age, years | 61.9±17.4 | 78.5±18.7 | 0.041 |
| Male | 42（73.7） | 53（76.8） | 0.840 |
| Ex-Smoker | 40（70.2） | 55（79.7） | 0.30 | |
