# Supplementary material
Source: Elsevier journal article supplement (https://www.sciencedirect.com/science/article/pii/S0300289619303849)
Supplement: mmc2 [file S0300289619303849:mmc2.docx]

**Table S2 Correlation between mortality risk and parameters of radiological quantitative data and clinical characteristics**

| Parameter | Univariate | | | Adjusted age | | |
| --- | --- | --- | --- | --- | --- | --- |
| HR | 95%CI | *P* value | HR | 95%CI | *P* value |
| FVC predicted (%) | 0.61 | 0.49-0.75 | 0.001 | 0.65 | 0.52-0.83 | 0.004 |
| TLC predicted (%) | 0.63 | 0.52-0.76 | 0.002 | 0.70 | 0.56-0.87 | 0.003 |
| DLCO predicted (%) | 0.62 | 0.50-0.78 | 0.001 | 0.67 | 0.52-0.85 | 0.002 |
| Reticular lesions volume (%) | 1.38 | 1.03-1.84 | 0.03 | 1.93 | 1.30-2.89 | 0.001 |
| HC lesions volume (%) | 3.70 | 1.94-8.26 | 0.01 | 3.02 | 1.80-5.10 | 0.01 |
| Over ILD lesions Volume (%) | 2.68 | 1.26-5.73 | 0.02 | 2.54 | 1.25-5.88 | 0.03 |
| KL-6 (U/mL) | 1.39 | 1.13-1.71 | 0.03 | 1.83 | 1.01-3.69 | 0.04 |
| CXCL-13 (pg/mL) | 1.05 | 1.00-1.09 | 0.02 | 1.03 | 1.02-1.06 | 0.03 |

HR: hazard ratio.
